# Supplementary material for: Transcriptome Analysis of Long Noncoding RNAs and mRNAs in Granulosa Cells of Jinghai Yellow Chickens Illuminated With Red Light
Source: Front Genet. 2021 Feb 9;12:563623. doi: 10.3389/fgene.2021.563623 (PMC7900633; doi:10.3389/fgene.2021.563623)
Supplement: Supplementary file 2 [file Table_2.XLSX]

## Sheet: Sheet1
Supplementary Table S2 Summary of sequencing results for chicken follicle granulosa cells from hens exposed to monochromatic red or white light.
Sample name	Raw reads	Clean reads	Clean bases	Valid rate (%)	Q30 (%)	GC content (%)
	(M)	(M)	(G)
R1	99.1	95.06	13.51	90.92	93.11	47.83
R2	97.97	90.45	12.89	87.72	90.94	46.86
R3	98.05	91.01	12.89	87.66	91.24	47.24
W1	98.32	94.6	13.54	91.81	93.63	48.21
W2	98.03	93.57	13.21	89.82	91.95	47.67
W3	98.97	93.68	13.14	88.49	91.4	49.04
